# Supplementary material
Source: PubMed Central journal article supplement (PMC7330886)
Supplement: NIHMS1061494-supplement-Supplemental.pdf [file NIHMS1061494-supplement-Supplemental.pdf]

1 **SUPPORTING INFORMATION**

2 **Silicone Pet Tags Associate Tris(1,3,-Dichloro-2-Isopropyl) Phosphate Exposures with Feline**  
3 **Hyperthyroidism**

4 *Carolyn M. Poutasse,<sup>1</sup> Julie B. Herbstman,<sup>2</sup> Mark E. Peterson,<sup>3</sup> Jana Gordon,<sup>4</sup> Peter H. Soboroff,<sup>5</sup>*  
5 *Darrell Holmes,<sup>2</sup> Dezere Gonzalez,<sup>2</sup> Lane G. Tidwell,<sup>1</sup> Kim A. Anderson\**

6 <sup>1</sup> Department of Toxicology, Oregon State University, Corvallis, OR 97331

7 <sup>2</sup> Department of Environmental Health Sciences, Columbia University, New York, NY 10032

8 <sup>3</sup> Animal Endocrine Clinic, 21 West 100<sup>th</sup> St., New York, NY 10025

9 <sup>4</sup> Carlson College of Veterinary Medicine, Oregon State University, Corvallis, OR 97331

10 <sup>5</sup> New York Cat Hospital, 143 Freedom Pl., New York, NY 10069

11

12 **\*Corresponding Author:**

13 Kim A. Anderson

14 Oregon State University

15 Department of Environmental and Molecular Toxicology

16 1007 Agricultural and Life Sciences Building

17 Corvallis, Oregon 97331, USA

18 Telephone: (541) 737-8501

19 Email: [kim.anderson@oregonstate.edu](mailto:kim.anderson@oregonstate.edu)

|    |                                                                                             |       |
|----|---------------------------------------------------------------------------------------------|-------|
| 20 | <b>Contents</b>                                                                             |       |
| 21 | Explanatory paragraphs. . . . .                                                             | S3-S6 |
| 22 | Cat Recruitment. . . . .                                                                    | S3    |
| 23 | Serum Thyroid Hormone Panel. . . . .                                                        | S3-S4 |
| 24 | Flame Retardant Extraction. . . . .                                                         | S4-S5 |
| 25 | Instrument Parameters. . . . .                                                              | S5    |
| 26 | Quality Control. . . . .                                                                    | S5-S6 |
| 27 | Particulate-Bound Fraction. . . . .                                                         | S6    |
| 28 | Table S1. Serum thyroid hormone panel reference ranges and summary statistics. . . . .      | S7    |
| 29 | Table S2. Target analytes, CAS numbers, and limits of detection and quantification. . . . . | S8-S9 |
| 30 | Table S3. Unadjusted odds ratios. . . . .                                                   | S10   |
| 31 | Table S4. OPE Spearman’s correlation coefficients. . . . .                                  | S11   |
| 32 | Table S5. PBDE Spearman’s correlation coefficients. . . . .                                 | S12   |
| 33 | Figure S1. Modified Kaplan-Meier survival curve for TDCIPP pet tag concentrations. . . . .  | S13   |
| 34 | Figure S2. Examples of recruited cats wearing the pet tag. . . . .                          | S14   |
| 35 | References. . . . .                                                                         | S16   |

## 36 **Cat Recruitment**

37 As stipulated by the inclusion criteria, all cats were over seven years old. Cat owners completed  
38 a consent form and three-page questionnaire about their cat's home environment. If multiple cats  
39 were recruited from the same home (n=10), owners completed a consent form and questionnaire  
40 for each cat individually.

41 The diagnosis of hyperthyroidism (n=39) was established on the basis of clinical signs consistent  
42 with the disease (e.g. weight loss despite good appetite), a palpable thyroid nodule on physical  
43 examination, high basal total thyroxine (TT<sub>4</sub>) and free T<sub>4</sub> (fT<sub>4</sub>) concentrations, and a good  
44 clinical response to treatment for hyperthyroidism. Hyperthyroid cats who had recently  
45 undergone treatment with radioiodine or were currently undergoing anti-thyroid drug treatment  
46 were eligible.

47 Non-hyperthyroid, or euthyroid, cats (n=39) were considered healthy on the basis of history,  
48 physical examination findings (e.g. lack of palpable thyroid tumors), and results of routine  
49 laboratory examinations (e.g. serum biochemical analysis) and serum thyroid profile. The serum  
50 thyroid profile included concentrations of fT<sub>4</sub>, TT<sub>4</sub>, total triiodothyronine (TT<sub>3</sub>), and thyroid-  
51 stimulating hormone (TSH) (see next section).

52 If an enrolled cat did not regularly wear a collar, researchers provided a complimentary collar.

53 Cats wore the pet tag for seven days before the owner removed the tag from the collar, resealed it  
54 in the PTFE bag, and returned it to the study coordinator.<sup>1,2</sup>

## 55 **Serum Thyroid Hormone Panel**

56 Non-hyperthyroid cats were required to undergo a serum thyroid panel of tests, including free  
57 thyroxine (fT<sub>4</sub>), total T<sub>4</sub> (TT<sub>4</sub>), total triiodothyronine (TT<sub>3</sub>), and thyroid-stimulating hormone  
58 (TSH), to assess his or her thyroid status and to determine eligibility for this study. After the cat  
59 owner completed the consent form and questionnaire, the recruiting veterinarian examined the  
60 cat for clinical findings of feline hyperthyroidism (e.g. palpable goiter). If no clinical features of  
61 feline hyperthyroidism were detected, then the veterinarian drew two to three mL of blood, and  
62 the sample was shipped to IDEXX Laboratories for the analysis of serum fT<sub>4</sub>, TT<sub>4</sub>, TT<sub>3</sub>, and TSH,  
63 conducted by assays validated for cats as previously reported.<sup>3-5</sup> If fT<sub>4</sub> and TT<sub>4</sub> concentrations  
64 were within the respective reference intervals (Table S1), then the cat was eligible to be a non-  
65 hyperthyroid participant for the study.

#### 66 **Flame Retardant Extraction**

67 The pet tags underwent post-deployment cleaning to remove particulate matter with two rinses of  
68 18 MΩ·cm water and one of isopropanol.<sup>2</sup> The tags were stored in amber glass jars at -20 °C, and  
69 then extracted and analyzed as previously reported.<sup>2,6</sup> Briefly, FBDE-118 and 2-bromobiphenyl  
70 were added as a recovery surrogates, with respective average recoveries of 91±18%  
71 (median=92%) and 90±19% (median=91%). Pet tags were extracted with two 100 mL volumes  
72 of ethyl acetate at ambient temperature. Sample extracts were combined and quantitatively  
73 reduced to one mL under nitrogen (Turbo-Vap L, Biotage, Charlotte, NC, USA; RapidVap,  
74 LabConco, Kansas City, MO, USA; N-EVAP 111, Organomation Associates, Berlin, MA,  
75 USA). Sample extracts were stored at 4 °C prior to instrument analysis.

76 The sample extract aliquots were combined with FBDE-126 as the internal standard. Targeted  
77 analysis of 44 FRs occurred using an Agilent 7890A gas chromatograph coupled with an Agilent

78 5975C mass spectrometer (Santa Clara, CA). The gas chromatograph was operated in electron  
79 impact mode (70 eV) and select ion monitoring.

## 80 **Instrument Parameters**

81 The instrument parameters were configured as previously reported.<sup>2</sup> Briefly, an Agilent 7890A  
82 gas chromatograph was coupled with an Agilent 5975C mass spectrometer (Santa Clara, CA) for  
83 analysis of 44 flame retardant analytes. An Agilent DB-5MS column (30 m × 0.25 mm × 0.25  
84 μm) was operated in electron impact mode (70 eV) and select ion monitoring. Samples were  
85 loaded using an Agilent 2 mm dimpled liner and pulsed splitless injection. The temperatures of  
86 the MS source, quadruple, and detector transfer line were set to 250°C, 150°C, and 300°C  
87 respectively. The pulse pressure was 30 psi (0.5 min) at a 3 mL/min purge and a 35 mL/min  
88 purge after 1 minute. The temperature profile started at 90°C (1.25 min), ramped to 240°C (10  
89 °C/min), ramped to 310°C (20 °C/min), and held at 310°C (10 min).

90 The limits of detection (LODs) and limits of quantitation (LOQs) were determined as previously  
91 reported.<sup>2</sup> Briefly, for each analyte, the lowest standard with a 15:1 signal-to-noise ratio was run  
92 seven times. The resulting standard deviation was used to calculate a 99% confidence interval  
93 with the Student's *t*-value and appropriate degree of freedom. LOQs were five times higher than  
94 the LODs. The method LODs and LOQs for all analytes, surrogate standards, and internal  
95 standard are reported in Table S2.

## 96 **Quality Control**

97 To ensure pet tags met the data quality objectives, QC samples<sup>1, 7</sup> accounted for 47% of the total  
98 samples analyzed. QC samples included cat tag conditioning verifications (n=4), trip blanks

99 (n=1), laboratory control blanks (n=4), sample duplicates (n=1), sample overspikes (n=2),  
100 instrument solvent blanks (n=43), and continuing calibration verifications (n=13). All target  
101 analytes were below their respective LODs in all blank QC. All calibration verifications were  
102 within data quality objectives at  $\pm 30\%$  of the true value for 70% of the target analytes.

103 A “cat collar” QC sample was included because two cat tags were returned with the collars still  
104 attached. Only TCIPP was detected in this QC, below the LOQ. Because the TCIPP LOQ was  
105 over 10-fold lower than either pet tag TCIPP concentration, no correction was made to the  
106 samplers returned with the collars.

### 107 **Particulate-Bound Fraction**

108 A measure of bioavailability is the octanol-air partition coefficients ( $K_{oa}$ ) of individual  
109 chemicals.<sup>8</sup> Because LMW PBDE congeners have lower  $\log K_{oa}$  values (e.g. 2 to 13),<sup>1</sup> they  
110 partition more readily into the air than particulate matter.<sup>9, 10</sup> Consequently, the LMW congeners  
111 also partition more readily into the silicone pet tags than particulate matter. In contrast, HMW  
112 PBDE congeners have higher  $\log K_{oa}$  values and are more frequently detected in house dust than  
113 in air.<sup>8, 9</sup>

114 For this study, any particulate matter on the silicone pet tags was removed during the post-  
115 deployment cleaning process (Section 2.4).<sup>1</sup> Some previous studies did not include this step prior  
116 to laboratory extractions.<sup>8</sup> In general, particulate-bound FRs are “biologically unavailable” for  
117 uptake by silicone PSDs.<sup>11</sup> Washing the samplers prior to extraction enabled this study to focus  
118 only on FRs sequestered by the polymer matrix.

119

120 **Table S1.** Reference ranges and summary statistics are reported for hormones included in the  
 121 serum thyroid profile for the 39 non-hyperthyroid cats recruited for the study. Out of free thyroxine  
 122 (fT<sub>4</sub>), total T4 (TT<sub>4</sub>), total triiodothyronine (TT<sub>3</sub>), and thyroid-stimulating hormone (TSH)  
 123 concentrations, a cat was eligible to be a non-hyperthyroid participant if the fT<sub>4</sub> and TT<sub>4</sub>  
 124 concentrations were within the respective reference intervals.

| Thyroid Hormone         | Reference Range | Geometric Mean | Standard Deviation | Median | Cat Study Range |
|-------------------------|-----------------|----------------|--------------------|--------|-----------------|
| fT <sub>4</sub> (ng/dL) | 0.7-2.6         | 1.15           | 0.41               | 1.10   | 0.50-2.10       |
| TT <sub>4</sub> (ug/dL) | 0.8-4.7         | 2.27           | 0.47               | 2.20   | 1.70-3.50       |
| TT <sub>3</sub> (ng/dL) | 52-182          | 34.0           | 7.12               | 35.0   | 4.1-48.0        |
| TSH (ng/mL)             | 0.05-0.42       | 0.04           | 0.07               | 0.05   | 0.01-0.41       |

125

126 **Table S2.** Target analytes, CAS numbers, and method limits of detection and quantification are reported.

| Target Analyte                                                    | Abbreviation        | CAS                          | MW    | Method<br>LOD<br>(pmol/g) <sup>a</sup> | Method<br>LOQ<br>(pmol/g) |
|-------------------------------------------------------------------|---------------------|------------------------------|-------|----------------------------------------|---------------------------|
| <i>Polybrominated diphenyl ethers</i>                             |                     |                              |       |                                        |                           |
| 2-bromodiphenyl ether                                             | BDE-1               | 7025-06-1                    | 249.1 | 3.01                                   | 15.1                      |
| 3-bromodiphenyl ether                                             | BDE-2               | 6976-00-2                    | 249.1 | 2.46                                   | 12.3                      |
| 4-bromodiphenyl ether                                             | BDE-3               | 101-55-3                     | 249.1 | 2.76                                   | 13.8                      |
| 2,4-dibromodiphenyl ether                                         | BDE-7               | 53592-10-2                   | 328.0 | 1.76                                   | 8.81                      |
| 2,4'-dibromodiphenyl ether                                        | BDE-8               | 49602-91-7                   | 328.0 | 1.70                                   | 8.51                      |
| 3,2'-dibromodiphenyl ether                                        | BDE-10              | 2050-47-7                    | 328.0 | 2.16                                   | 10.8                      |
| 3,3'-dibromodiphenyl ether                                        | BDE-11              | 6903-63-5                    | 328.0 | 1.83                                   | 9.15                      |
| 3,4-dibromodiphenyl ether                                         | BDE-12              | 189084-59-1                  | 328.0 | 1.80                                   | 8.99                      |
| 3,4'-dibromodiphenyl ether                                        | BDE-13              | 57186-90-0                   | 328.0 | 1.19                                   | 5.91                      |
| 4,4'-dibromodiphenyl ether                                        | BDE-15              | 2050-47-7                    | 328.0 | 1.05                                   | 5.24                      |
| 2,2',4-tribromodiphenyl ether                                     | BDE-17              | 147217-75-2                  | 406.9 | 1.51                                   | 7.52                      |
| 2,3',4-tribromodiphenyl ether                                     | BDE-25              | 147217-77-4                  | 406.9 | 1.12                                   | 5.58                      |
| 2,4,4'-tribromodiphenyl ether & 2',3,4-<br>tribromodiphenyl ether | BDE-28 & BDE-<br>33 | 41318-75-6 & 337513-<br>67-4 | 406.9 | 1.02                                   | 5.11                      |
| 2,4,6-tribromodiphenyl ether                                      | BDE-30              | 49690-94-0                   | 406.9 | 1.39                                   | 6.96                      |
| 2,4',6-tribromodiphenyl ether                                     | BDE-32              | 189084-60-4                  | 406.9 | 1.52                                   | 7.62                      |
| 3,3',4-tribromodiphenyl ether                                     | BDE-35              | 147217-80-9                  | 406.9 | 2.90                                   | 14.5                      |
| 3,4,4'-tribromodiphenyl ether                                     | BDE-37              | 147217-81-0                  | 406.9 | 0.654                                  | 3.27                      |
| 2,2',4,4'-tetrabromodiphenyl ether                                | BDE-47              | 5436-43-1                    | 485.8 | 1.59                                   | 7.93                      |
| 2,2',4,5'-tetrabromodiphenyl ether                                | BDE-49              | 243982-82-3                  | 485.8 | 1.46                                   | 7.29                      |
| 2,3',4,4'-tetrabromodiphenyl ether                                | BDE-66              | 189084-61-5                  | 485.8 | 1.94                                   | 9.70                      |
| 2,3',4',6-tetrabromodiphenyl ether                                | BDE-71              | 189084-62-6                  | 485.8 | 1.04                                   | 5.23                      |
| 2,4,4',6-tetrabromodiphenyl ether                                 | BDE-75              | 189084-63-7                  | 485.8 | 1.43                                   | 7.14                      |
| 3,3',4,4'-tetrabromodiphenyl ether                                | BDE-77              | 93703-48-1                   | 485.8 | 0.642                                  | 3.21                      |
| 2,2',4,4',5-pentabromodiphenyl ether                              | BDE-99              | 60348-60-9                   | 564.7 | 1.52                                   | 7.61                      |
| 2,2',4,4',6-pentabromodiphenyl ether                              | BDE-100             | 189084-64-8                  | 564.7 | 1.57                                   | 7.84                      |



|                                                |               |             |       |       |      |
|------------------------------------------------|---------------|-------------|-------|-------|------|
| 2,3,4,5,6-pentabromodiphenyl ether             | BDE-116       | 189084-65-9 | 564.7 | 1.42  | 7.10 |
| 2,3',4,4',5-pentabromodiphenyl ether           | BDE-118       | 446254-80-4 | 564.7 | 1.51  | 7.54 |
| 2,3',4,4',6-pentabromodiphenyl ether           | BDE-119       | 189084-66-0 | 564.7 | 1.08  | 5.38 |
| 2,2',3,4,4',5'-hexabromodiphenyl ether         | BDE-138       | 182677-30-1 | 643.6 | 1.17  | 5.87 |
| 2,2',4,4',5,5'-hexabromodiphenyl ether         | BDE-153       | 68631-49-2  | 643.6 | 0.766 | 3.82 |
| 2,2',4,4',5,6'-hexabromodiphenyl ether         | BDE-154       | 207122-15-4 | 643.6 | 0.928 | 4.63 |
| 2,3,4,4',5,6-hexabromodiphenyl ether           | BDE-166       | 189084-58-0 | 643.6 | 0.771 | 3.85 |
| 2,2',3,4,4',5,6-heptabromodiphenyl ether       | BDE-181       | 189084-67-1 | 715.5 | 12.5  | 62.8 |
| 2,2',3,4,4',5',6-heptabromodiphenyl ether      | BDE-183       | 207122-16-5 | 715.5 | 10.8  | 53.9 |
| 2,3,3',4,4',5,6-heptabromodiphenyl ether       | BDE-190       | 189084-68-2 | 715.5 | 7.10  | 35.5 |
| <i>Organophosphate flame retardants</i>        |               |             |       |       |      |
| Tri-n-butyl phosphate                          | TNBP          | 126-73-8    | 266.3 | 4.43  | 22.3 |
| Tri-n-ethyl phosphate                          | TNEP          | 78-40-0     | 182.2 | 10.8  | 53.9 |
| Triphenyl phosphate                            | TPHP          | 115-86-6    | 326.3 | 1.31  | 6.53 |
| Tris(2-chloroethyl) phosphate                  | TCEP          | 115-96-8    | 285.5 | 20.4  | 102  |
| Tris(1-chloro-2-isopropyl) phosphate           | TCIPP         | 13674-84-5  | 327.6 | 27.7  | 139  |
| Tris(1,3-dichloro-2-isopropyl) phosphate       | TDCIPP        | 13674-87-8  | 427.9 | 20.8  | 104  |
| <i>Brominated flame retardants</i>             |               |             |       |       |      |
| 2-ethylhexyl-2,3,4,5-tetrabromobenzoate        | EH-TBB        | 183658-27-7 | 549.9 | 8.37  | 41.8 |
| Di(2-ethylhexyl)tetrabromophthalate            | TBPH          | 26040-51-7  | 706.1 | 1.46  | 7.29 |
| <i>Reference Standards</i>                     |               |             |       |       |      |
| 2-Bromobiphenyl                                | 2-BBP (SS)    | 2052-07-5   | 233.1 | 3.54  | 17.7 |
| 5'-Fluoro-3,3',4,4',5-pentabromodiphenyl ether | FBDE-126 (IS) | N/A         | 583.7 | N/A   | N/A  |
| 5'-Fluoro-2,3',4,4',5-pentabromodiphenyl ether | FBDE-118 (SS) | N/A         | 583.7 | 1.78  | 8.89 |

127 LOD – Limit of detection; LOQ – Limit of quantitation; SS – Surrogate standard; IS – Internal standard; N/A – Not applicable.

128 **Table S3.** Unadjusted odds ratios are reported for flame retardants detected in at least one tag.

| Target Analyte      | Unadjusted Odds Ratio (95% CI) | P-value (odds ratio) |
|---------------------|--------------------------------|----------------------|
| TNBP <sup>a</sup>   | 1.61 (0.313, 8.29)             | 0.566                |
| TNEP <sup>a</sup>   | 0.852 (0.117, 6.23)            | 0.874                |
| TCEP <sup>a</sup>   | 0.278 (0.027, 2.91)            | 0.279                |
| TCIPP <sup>a</sup>  | 1.03 (0.952, 1.12)             | 0.409                |
| TDCIPP <sup>a</sup> | 1.36 (0.923, 2.02)             | <b>0.059*</b>        |
| TPHP <sup>a</sup>   | 1.09 (0.469, 2.53)             | 0.840                |
| $\Sigma OPEs^a$     | <i>1.03 (0.955, 1.12)</i>      | <i>0.415</i>         |
| BDE-8               | --                             | --                   |
| BDE-12              | --                             | --                   |
| BDE-15              | --                             | --                   |
| BDE-17              | --                             | --                   |
| BDE-25              | --                             | --                   |
| BDE-28& BDE-33      | 0.390 (0.076, 1.99)            | 0.258                |
| BDE-47              | 0.940 (0.447, 1.98)            | 0.870                |
| BDE-49              | 0.702 (0.177, 2.78)            | 0.614                |
| BDE-66              | 0.759 (0.045, 12.7)            | 0.848                |
| BDE-99              | 0.987 (0.508, 1.92)            | 0.970                |
| BDE-100             | 0.641 (0.329, 1.25)            | 0.190                |
| BDE-138             | --                             | --                   |
| BDE-153             | 0.689 (0.291, 1.63)            | 0.396                |
| BDE-154             | 0.501 (0.156, 1.61)            | 0.246                |
| $\Sigma BDEs$       | <i>0.859 (0.564, 1.01)</i>     | <i>0.326</i>         |
| EH-TBB <sup>a</sup> | 0.489 (0.061, 3.93)            | 0.492                |
| $\Sigma BFRs^a$     | <i>0.490 (0.061, 3.93)</i>     | <i>0.492</i>         |

129 **Bold\*:** p<0.10

130 <sup>a</sup>Odds ratio calculated using nmol/g tag concentrations

131

132

133 **Table S4.** Spearman's rho correlation coefficients are reported for OPEs detected in over 10% of  
 134 matched cat tag samples (n=78). Correlation coefficients were calculated from concentrations in  
 135 units of picomole of target analyte per gram of pet tag.

|        |                | TPHP | TCIPP             | TDCIPP            | TNBP          | TCEP          | TNEP          |
|--------|----------------|------|-------------------|-------------------|---------------|---------------|---------------|
| TPHP   | r <sub>s</sub> | 1    | 0.461             | 0.305             | 0.296         | 0.238         | 0.131         |
|        | p-value        | --   | <b>&lt;0.001*</b> | <b>0.007*</b>     | <b>0.009*</b> | <b>0.036*</b> | 0.253         |
| TCIPP  | r <sub>s</sub> |      | 1                 | 0.394             | 0.111         | 0.082         | 0.263         |
|        | p-value        |      | --                | <b>&lt;0.001*</b> | 0.335         | 0.478         | <b>0.020*</b> |
| TDCIPP | r <sub>s</sub> |      |                   | 1                 | -0.053        | 0.271         | 0.155         |
|        | p-value        |      |                   | --                | 0.648         | <b>0.016*</b> | 0.176         |
| TNBP   | r <sub>s</sub> |      |                   |                   | 1             | 0.129         | 0.033         |
|        | p-value        |      |                   |                   | --            | 0.259         | 0.773         |
| TCEP   | r <sub>s</sub> |      |                   |                   |               | 1             | 0.047         |
|        | p-value        |      |                   |                   |               | --            | 0.684         |
| TNEP   | r <sub>s</sub> |      |                   |                   |               |               | 1             |
|        | p-value        |      |                   |                   |               |               | --            |

136 **Bold\*:** p<0.05

137

138 **Table S5.** Spearman's correlation coefficients are reported for PBDE congeners detected in over  
 139 10% of match cat tag samples (n=78). Correlation coefficients were calculated from concentrations  
 140 in units of picomole of target analyte per gram of pet tag.

|         |                | BDE-47 | BDE-99            | BDE-100           | BDE-153           | BDE-154           | BDE-49            |
|---------|----------------|--------|-------------------|-------------------|-------------------|-------------------|-------------------|
| BDE-47  | r <sub>s</sub> | 1      | 0.577             | 0.491             | 0.519             | 0.592             | 0.462             |
|         | p-value        | --     | <b>&lt;0.001*</b> | <b>&lt;0.001*</b> | <b>&lt;0.001*</b> | <b>&lt;0.001*</b> | <b>&lt;0.001*</b> |
| BDE-99  | r <sub>s</sub> |        | 1                 | 0.542             | 0.632             | 0.675             | 0.439             |
|         | p-value        |        | --                | <b>&lt;0.001*</b> | <b>&lt;0.001*</b> | <b>&lt;0.001*</b> | <b>&lt;0.001*</b> |
| BDE-100 | r <sub>s</sub> |        |                   | 1                 | 0.620             | 0.537             | 0.426             |
|         | p-value        |        |                   | --                | <b>&lt;0.001*</b> | <b>&lt;0.001*</b> | <b>&lt;0.001*</b> |
| BDE-153 | r <sub>s</sub> |        |                   |                   | 1                 | 0.830             | 0.445             |
|         | p-value        |        |                   |                   | --                | <b>&lt;0.001*</b> | <b>&lt;0.001*</b> |
| BDE-154 | r <sub>s</sub> |        |                   |                   |                   | 1                 | 0.543             |
|         | p-value        |        |                   |                   |                   | --                | <b>&lt;0.001*</b> |
| BDE-49  | r <sub>s</sub> |        |                   |                   |                   |                   | 1                 |
|         | p-value        |        |                   |                   |                   |                   | --                |

141 **Bold\*:** p<0.05.

142

143 **Figure S1.** The Mantel-Cox non-parametric test for comparing survival curves indicated that  
144 hyperthyroid and non-hyperthyroid TDCIPP tag concentrations were statistically different.

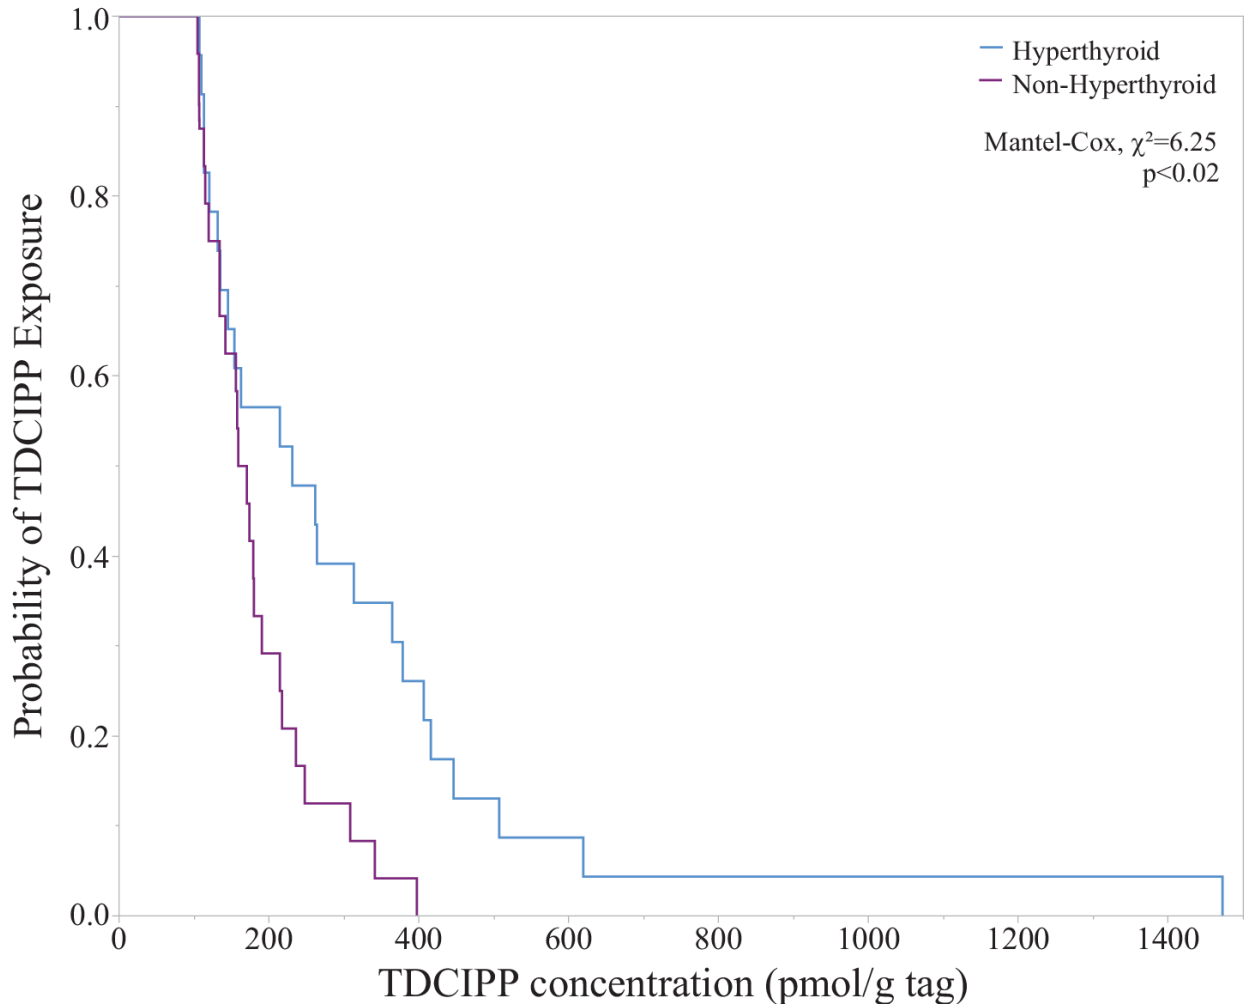

145  
146  
147

148 **Figure S2.** Cat owners appreciated the opportunity to share photos of their cats participating in the  
149 study.

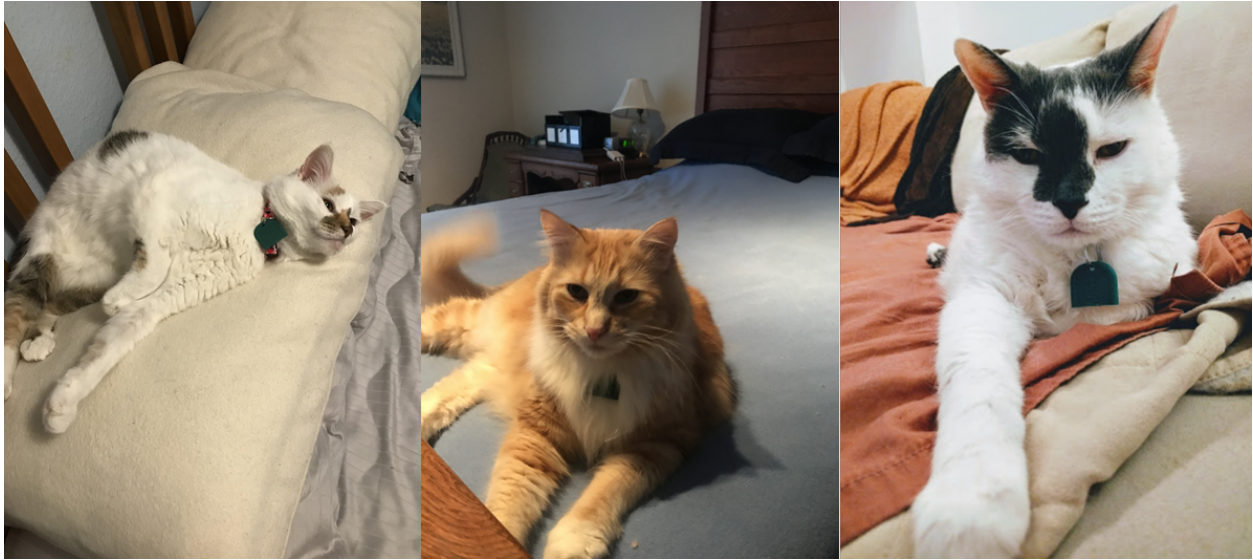

150

151

152

153 REFERENCES

154 1. Anderson, K. A.; Points III, G. L.; Donald, C. E.; Dixon, H. M.; Scott, R. P.; Wilson, G.;  
155 Tidwell, L. G.; Hoffman, P. D.; Herbstman, J. B.; O'Connell, S. G. Preparation and Performance  
156 Features of Wristband Samplers and Considerations for Chemical Exposure Assessment. *J. Expo.*  
157 *Sci. Environ. Epidemiol.* **2017**, *27* (6), 551.

158 2. Kile, M. L.; Scott, R. P.; O'Connell, S. G.; Lipscomb, S.; MacDonald, M.; McClelland, M.;  
159 Anderson, K. A. Using Silicone Wristbands to Evaluate Preschool Children's Exposure to Flame  
160 Retardants. *Environ. Res.* **2016**, *147*, 365-372.

161 3. Peterson, M. E.; Rishniw, M.; Bilbrough, G. E.; Cote, K. B. Comparison of in-Clinic Point-  
162 of-Care and Reference Laboratory Total Thyroxine Immunoassays for Diagnosis and Post-  
163 Treatment Monitoring of Hyperthyroid Cats. *J. Feline Med. Surg.* **2018**, *20* (4), 319-324.

164 4. Lucy, J. M.; Peterson, M. E.; Randolph, J. F.; Scrivani, P. V.; Rishniw, M.; Davignon, D.  
165 L.; Thompson, M. S.; Scarlett, J. M. Efficacy of Low-Dose (2 Millicurie) Versus Standard-Dose  
166 (4 Millicurie) Radioiodine Treatment for Cats with Mild-to-Moderate Hyperthyroidism. *J. Vet.*  
167 *Intern. Med.* **2017**, *31* (2), 326-334.

168 5. Peterson, M. E. More Than Just T4: Diagnostic Testing for Hyperthyroidism in Cats. *J*  
169 *Feline Med. Surg.* **2013**, *15* (9), 765-777.

170 6. O'Connell, S. G.; Kincl, L. D.; Anderson, K. A. Silicone Wristbands as Personal Passive  
171 Samplers. *Environ. Sci. Technol.* **2014**, *48* (6), 3327-3335.

172 7. Project Quality Assurance and Quality Control. In *Epa Publication Sw-846: Test Methods*  
173 *for Evaluating Solid Waste, Physical/Chemical Methods*, Final Update V to Ed 3 ed.; 2015.

- 174 8. Hammel, S. C.; Phillips, A. L.; Hoffman, K.; Stapleton, H. M. Evaluating the Use of  
175 Silicone Wristbands to Measure Personal Exposure to Brominated Flame Retardants. *Environ. Sci.*  
176 *Technol.* **2018**, *52* (20), 11875-11885.
- 177 9. Liagkouridis, L.; Cousins, A. P.; Cousins, I. T. Physical-Chemical Properties and  
178 Evaluative Fate Modelling of 'Emerging' and 'Novel' Brominated and Organophosphorus Flame  
179 Retardants in the Indoor and Outdoor Environment. *Sci. Total Environ.* **2015**, *524*, 416-426.
- 180 10. Weschler, C. J.; Nazaroff, W. W. SVOC Exposure Indoors: Fresh Look at Dermal  
181 Pathways. *Indoor Air* **2012**, *22* (5), 356-377.
- 182 11. Anderson, K.; Hillwalker, W. Bioavailability. In *Ecotoxicology*, Jorgensen, S. E.; Fath, B.  
183 D., Eds. Elsevier: Oxford, 2008; Vol. 1, 348-357.
